# Supplementary material for: CCR9 axis inhibition enhances hepatic migration of plasmacytoid DCs and protects against liver injury
Source: JCI journal article supplement (doi:10.1172/jci.insight.159910), 2022-08-09
Supplement: sd1 [file 1]

You are being redirected.
