# Supplementary material for: CCR9 axis inhibition enhances hepatic migration of plasmacytoid DCs and protects against liver injury
Source: JCI journal article supplement (doi:10.1172/jci.insight.159910), 2022-08-09
Supplement: sd1 [file 1]

## Supplementary Information for

### **CCR9 axis inhibition enhances hepatic migration of plasmacytoid dendritic cells and protects against liver injury**

Yuzo Koda,<sup>1,2</sup> Nobuhiro Nakamoto,<sup>1\*</sup> Po-Sung Chu,<sup>1</sup> Toshiaki Teratani,<sup>1</sup> Akihisa Ueno,<sup>3</sup> Takeru Amiya,<sup>1,2</sup> Nobuhito Taniki,<sup>1</sup> Sayako Chiba,<sup>1</sup> Kentaro Miyamoto,<sup>1</sup> Michiie Sakamoto,<sup>3</sup> Takanori Kanai<sup>1,4\*</sup>

<sup>1</sup>Division of Gastroenterology and Hepatology, Department of Internal Medicine, Keio University School of Medicine, Tokyo, Japan

<sup>2</sup>Mitsubishi Tanabe Pharma Corporation, Kanagawa, Japan

<sup>3</sup>Department of Pathology, Keio University School of Medicine, Shinanomachi, Tokyo, Japan

<sup>4</sup>Japan Agency for Medical Research and Development, AMED, Tokyo, Japan

\*Address correspondence to Nobuhiro Nakamoto ([nobuhiro@z2.keio.jp](mailto:nobuhiro@z2.keio.jp), +81-3353-1211) and Takanori Kanai ([takagast@z2.keio.jp](mailto:takagast@z2.keio.jp), +81-3353-1211), Division of Gastroenterology and Hepatology, Department of Internal Medicine, Keio University School of Medicine, Tokyo 1608582, Japan.

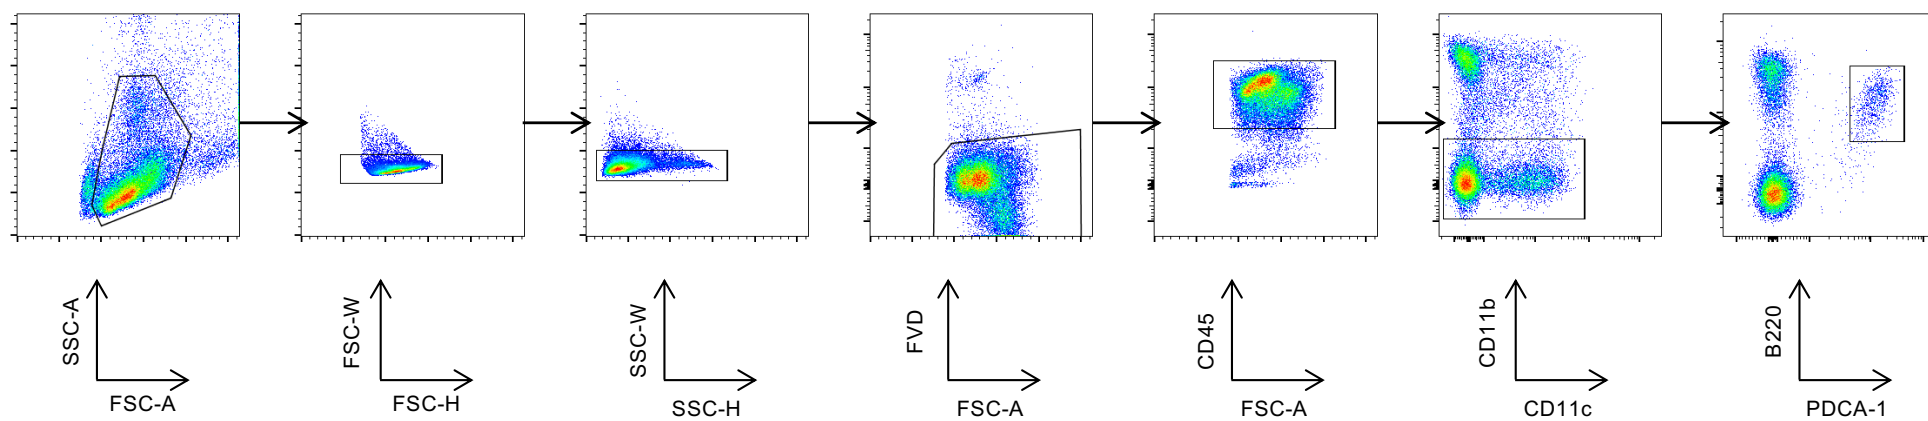

**Supplemental Figure 1. The gating strategy of FACS analysis.**  
Isolated mononuclear cells from various organs were analyzed.

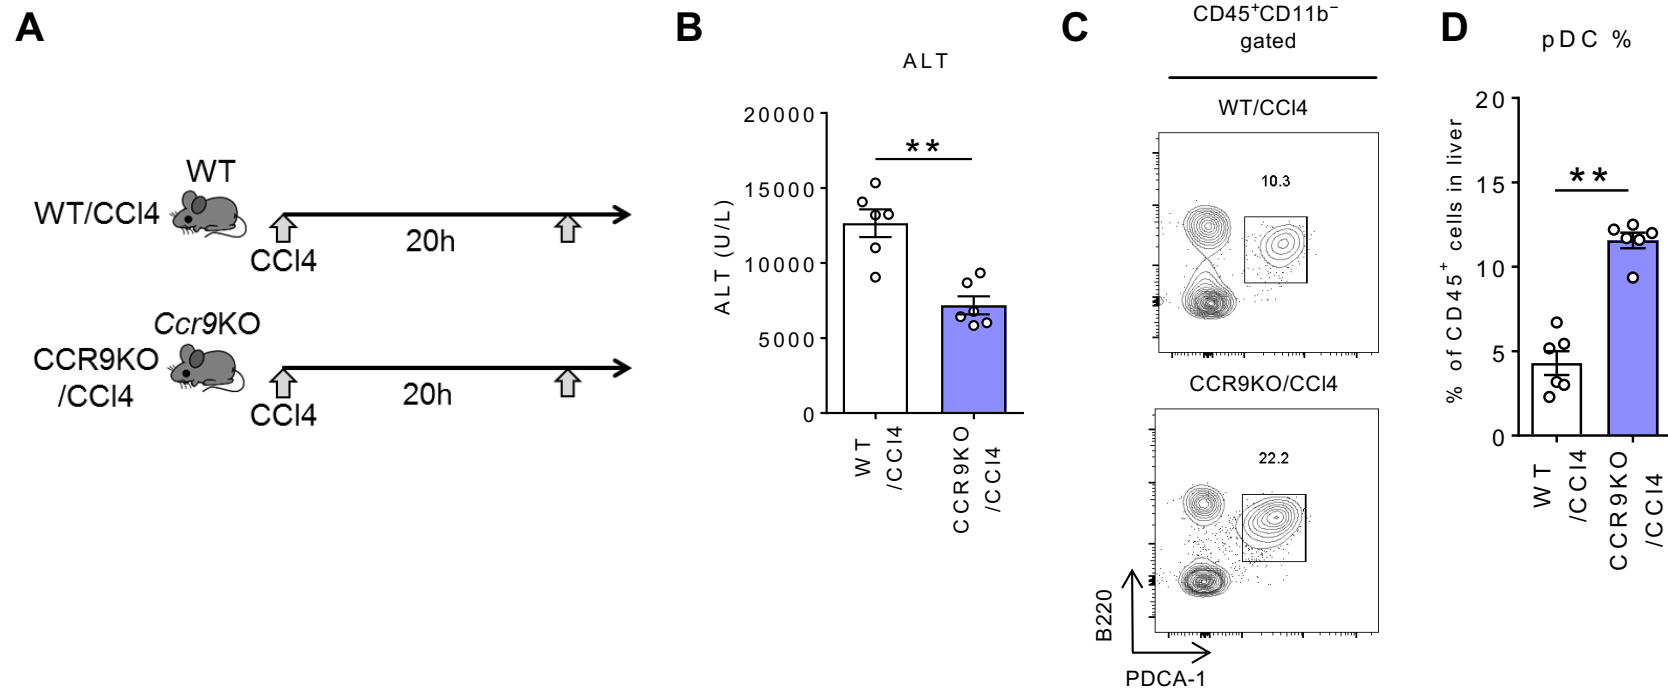

**Supplemental Figure 2. CCR9 deficiency induces accumulation of pDCs in the liver under CCl4-induced inflammation.**

(A) Study design. WT or *Ccr9*<sup>-/-</sup> mice were intraperitoneally injected with CCl4 (1 ml/kg) in corn oil or corn oil. All mice were sacrificed and analyzed 20 h following CCl4 injection. (B) Serum ALT levels. (C) Representative B220 and PDCA-1 staining of CD45<sup>+</sup>CD11b<sup>-</sup>-gated liver MNCs. (D) Mean percentages of pDCs in the liver during CCl4-induced hepatitis. Data represent the mean  $\pm$  SEM (n = 6 per group). \*\*p < 0.01, Student's t-test. Data are combined from two independent experiments.

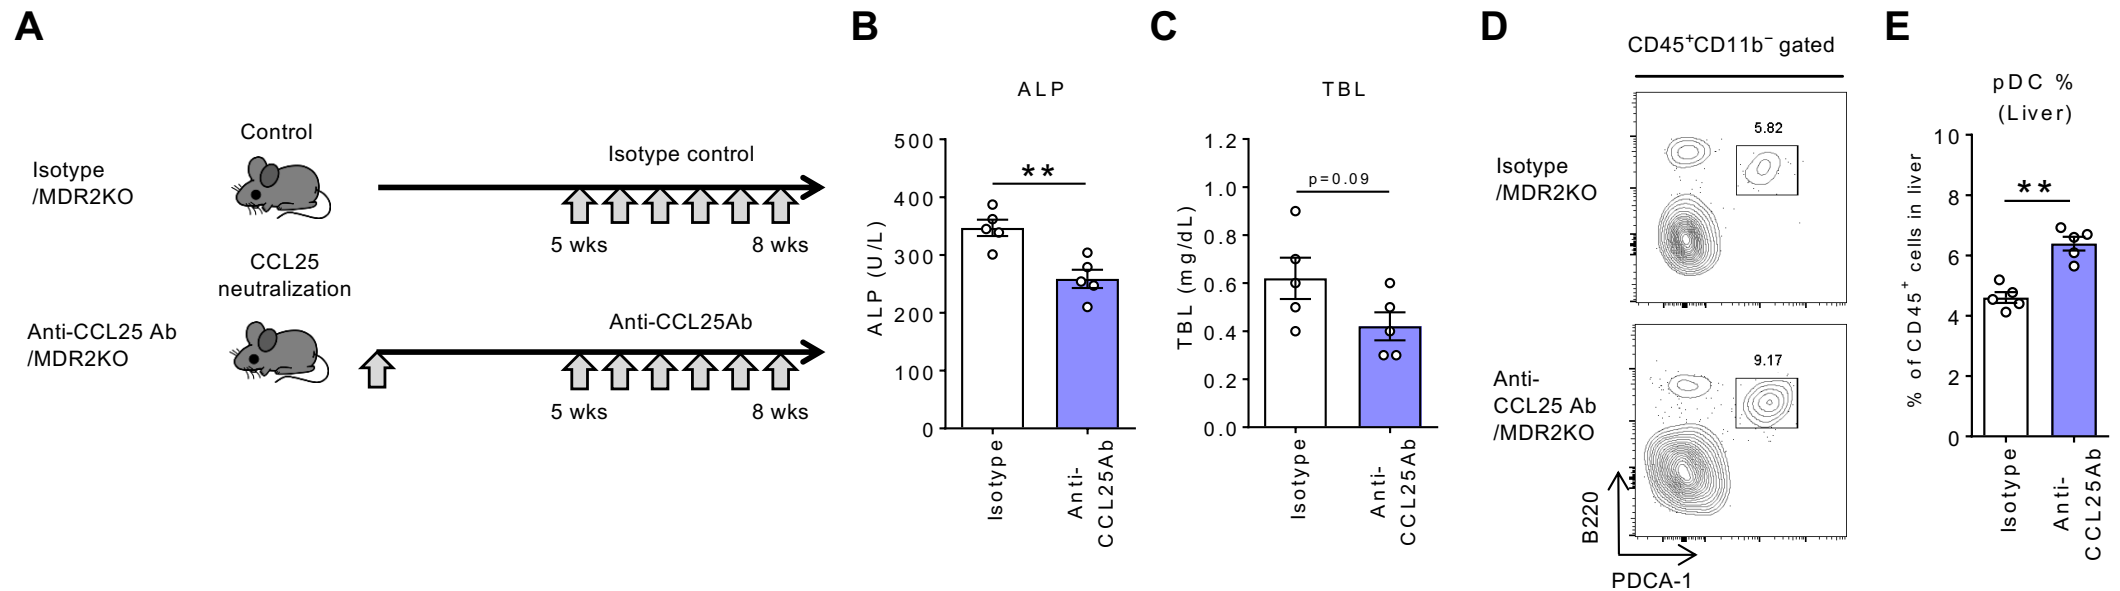

**Supplemental Figure 3. CCL25 neutralization induces accumulation of pDCs in the liver under MDR2 deficiency-induced cholestasis.** (A) Study design. Mdr2<sup>-/-</sup> mice (FVB background) were intravenously injected with anti-CCL25 antibody (100 µg/mouse, R&D, clone 89818) or isotype control (100 µg/mouse, BioXCell, clone LTF-2) in PBS twice per week. All mice were sacrificed and analyzed 3 weeks after the first injection of the antibody at 5 weeks of age. (B) Serum ALP levels. (C) Serum total bilirubin levels. (D) Representative B220 and PDCA-1 staining of CD45<sup>+</sup>CD11b<sup>-</sup> gated liver MNCs. (E) Mean percentages of pDCs in the liver. Data represent the mean  $\pm$  SEM (n = 5 per group). \*\*p < 0.01, Student's t-test. Data are combined from two independent experiments.

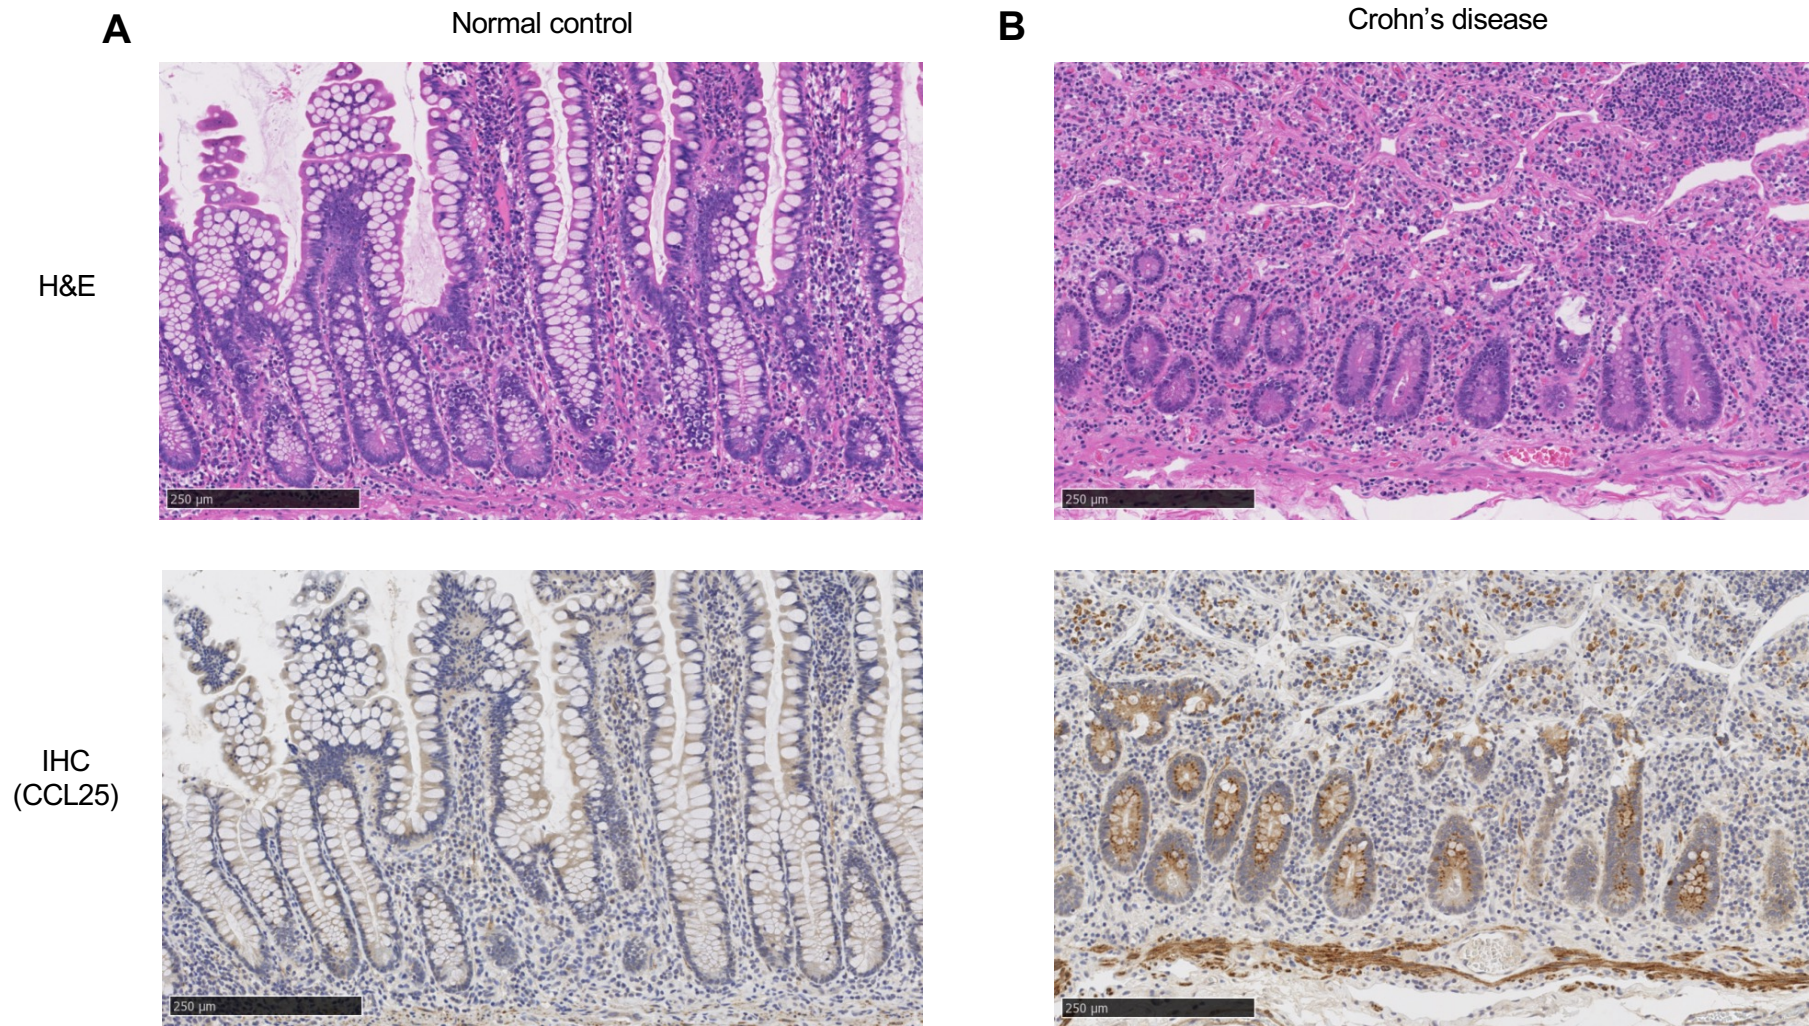

**Supplemental Figure 4. CCL25 is expressed in the small intestinal epithelium of healthy controls and patients with Crohn's disease.**

Representative photomicrographs of H&E-stained (upper) and anti-CCL25 Ab-stained (lower) IHC sections of the small intestine. (A) The normal control derived from the colon cancer patient. (B) The patient with Crohn's disease. Scale bars: 250 μm.
